# Supplementary material for: Aryl-functionalised α,α′-Trehalose 6,6′-Glycolipid Induces Mincle-independent Pyroptotic Cell Death
Source: Springer Nature journal article supplement (doi:10.1007/s10753-023-01814-5), 2023-05-04
Supplement: MOESM3 [file 25318876]

## ~ SUPPORTING INFORMATION ~

### **Aryl-functionalised $\alpha,\alpha'$ -trehalose 6,6'-glycolipid induces Mincle-independent pyroptotic cell death**

Kristel Kodar,<sup>a,b</sup> Emma M. Dangerfield,<sup>a,b</sup> Amy J. Foster,<sup>a,b</sup> Devlin Forsythe,<sup>b,c</sup>  
Shigenari Ishizuka,<sup>d,e</sup> Melanie J. McConnell,<sup>b,c</sup> Sho Yamasaki,<sup>d,e,f,g</sup> Mattie S. M.  
Timmer,<sup>a,b,\*</sup> Bridget L. Stocker<sup>a,b,\*</sup>

<sup>a</sup> School of Chemical and Physical Sciences, Victoria University of Wellington, PO  
Box 600 Wellington, New Zealand

<sup>b</sup> Centre for Biodiscovery, Victoria University of Wellington, PO Box 600,  
Wellington, New Zealand

<sup>c</sup> School of Biological Sciences, PO Box 600, Wellington, New Zealand

<sup>d</sup> Department of Molecular Immunology, Research Institute for Microbial Diseases,  
Osaka University, Suita, Osaka, Japan

<sup>e</sup> Laboratory of Molecular Immunology, Immunology Frontier Research Center,  
Osaka University, Suita, Osaka, Japan

<sup>f</sup> Division of Molecular Immunology, Medical Institute of Bioregulation, Kyushu  
University, Fukuoka, Fukuoka, Japan

<sup>g</sup> Division of Molecular Immunology, Medical Mycology Research Center, Chiba  
University, Chiba, Japan

\*Corresponding authors: Tel.: +64 4 463 6529; fax: +64 4 4 463 5241

E-mail address: [bridget.stocker@vuw.ac.nz](mailto:bridget.stocker@vuw.ac.nz); [mattie.timmer@vuw.ac.nz](mailto:mattie.timmer@vuw.ac.nz)

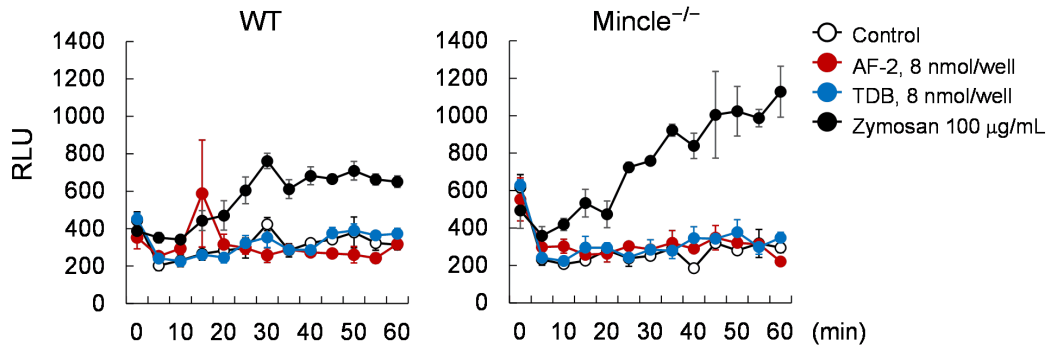

**SI Figure 1: AF-2 did not induce ROS production in un-primed GM-CSF BMDMs.** Bone marrow cells from WT and Mincle<sup>-/-</sup> mice were cultured in 10 % FCS/RPMI supplemented with 50 ng/mL GM-CSF (BioLegend) for eight days. Cells were detached using 1 mM EDTA-supplemented PBS and added into 96-well plates coated with 8 nmol/well of AF-2 or TDB, or 100 mg/mL zymosan (SIGMA), in the presence of 300 μM luminol (Nacalai tesque) for 60 min. Luminescence was quantified by POWERSCAN HT (DS Pharma Biomedical). Data are presented as mean ± SE of triplicate assays.

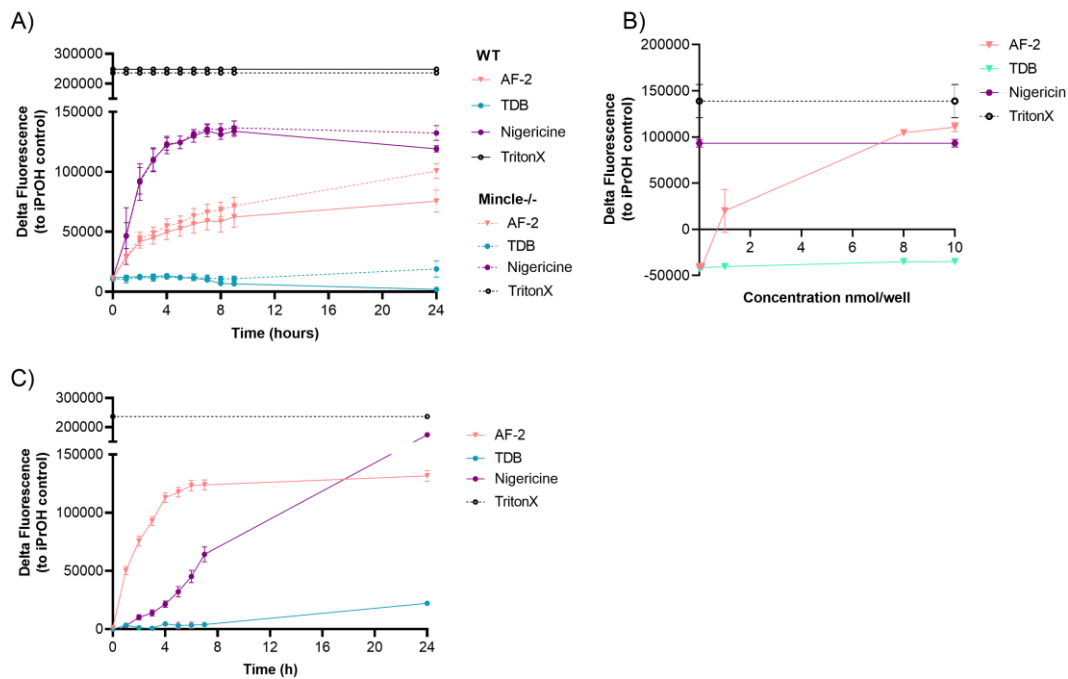

**SI Figure 2. The kinetics of AF-2 induced cell death.** A) Wild-type (WT) and Mincle<sup>-/-</sup> GM-CSF BMDMs or C) 5 ng/mL LPS primed RAW264.7 cells were incubated in plates coated with AF-2 or TDB (8 nmol/well), solubilised nigericin (10  $\mu$ M), or Triton X (1%). Fluorescence of Sytox Green (1  $\mu$ M) was measured over time; results are calculated relative to iPrOH control fluorescence. B) C57BL/6 GM-CSF BMDMs were incubated in plates coated with various concentrations of AF-2 or TDB (0.01, 0.1, 1, 8 and 10 nmol/well), solubilised nigericin (10  $\mu$ M), or Triton X (1%), and SytoxGreen fluorescence was measured at 24 h. Data represents the Mean  $\pm$  SEM of a representative experiment performed three times in triplicate.

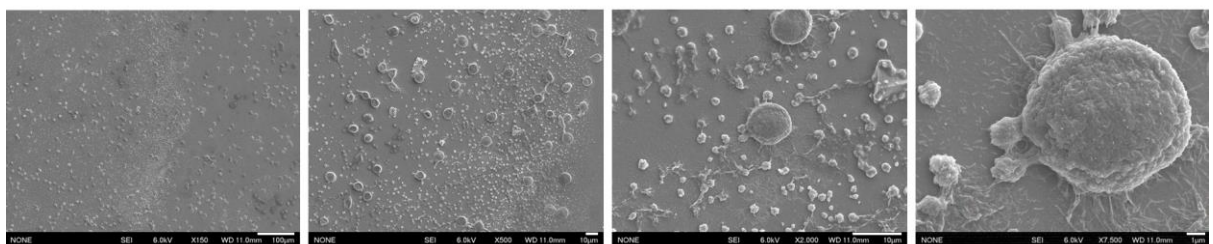

**SI Figure 3. Morphological changes induced by TDB.** SEM of RAW264.7 cells stimulated with TDB. RAW264.7 cells were primed with LPS (1  $\mu$ g/mL) and seeded on conductive silicon wafers coated with TDB (4 h, 8 nmol/slide). Scanning electron cyromicroscope (CryoSEM) images were taken at four magnifications (x 150, x500, x2,000, x7,500). The white scale bar indicates 100, 10, 10 or 1  $\mu$ m for the x 150, x500, x2,000, x7,500 magnifications, respectively.

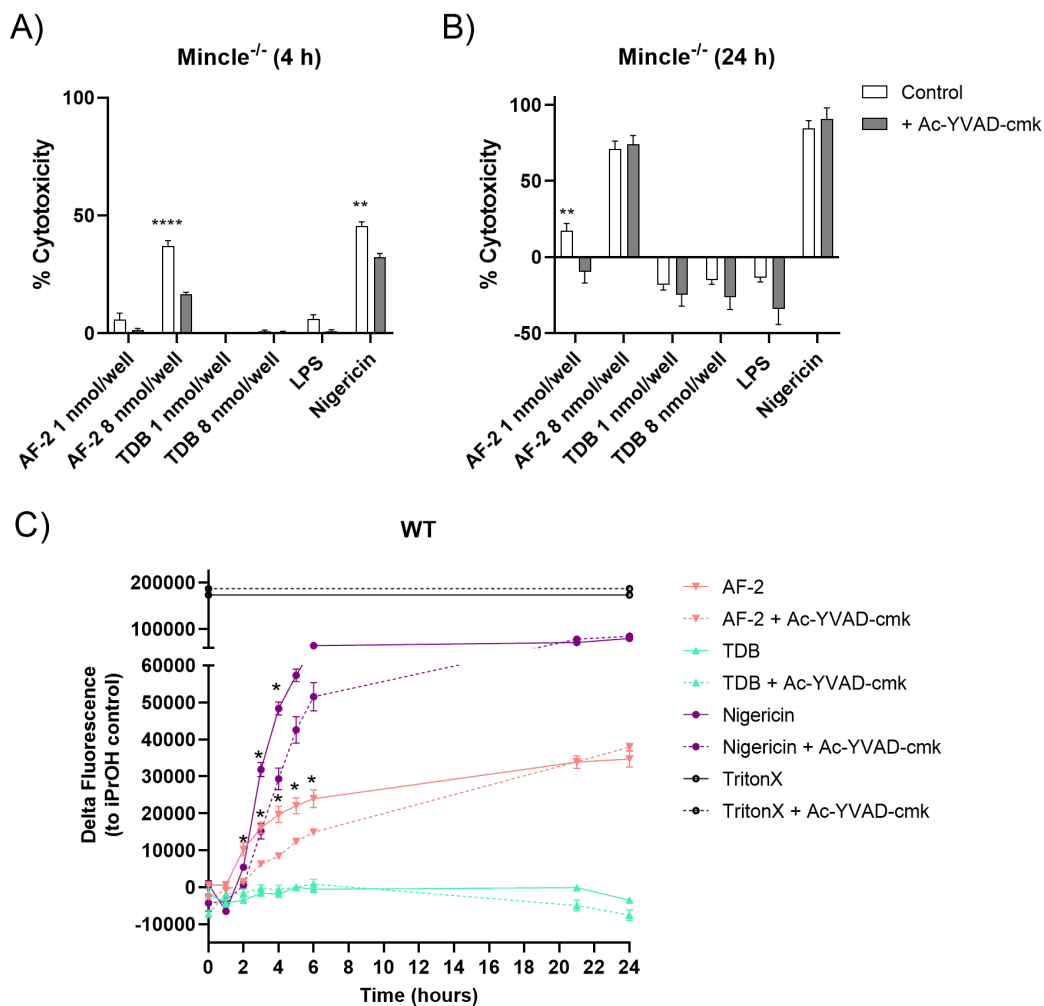

**SI Figure 4. The effect of Caspase-1 inhibition on AF-2 induced cell death.** A) Wild-type (WT) and Mincle<sup>-/-</sup> GM-CSF BMDMs were left untreated or pre-treated with Caspase-1 inhibitor AcYVAD-cmk (40  $\mu$ M) before adding to plates coated with AF-2 or TDB (8 nmol/well concentration for Sytox Green assay; 1 or 8 nmol/well for LDH assay), or stimulated with solubilised LPS (100 ng/mL), nigericin (10  $\mu$ M) or TritonX (1%). LDH release was measured at A) 4 h and B) 24 h from the supernatant. Data represent the Mean  $\pm$  SEM of three independent experiments performed in triplicate. C) Fluorescence of Sytox Green (1  $\mu$ M) was measured over time; results are calculated relative to iPrOH control fluorescence. Data represents the Mean  $\pm$  SEM of a representative experiment performed three times in triplicate. Statistical significance was calculated in comparison to iPrOH using Multiple t-test, \*\*\*\*  $P \leq 0.0001$ , \*\*  $P \leq 0.01$ , \*  $P \leq 0.05$ .

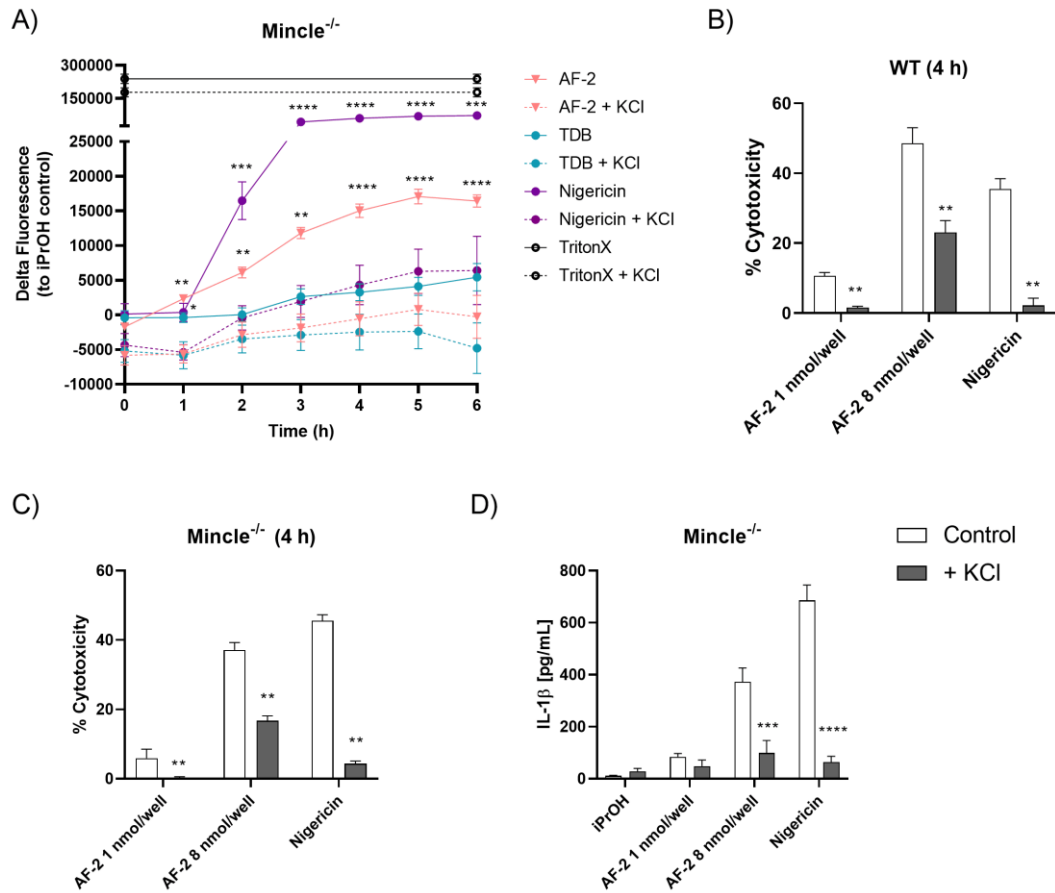

### SI Figure 5. AF-2 induced pyroptosis is also dependent on K<sup>+</sup> efflux.

Wild-type (WT) and Mincle<sup>-/-</sup> GM-CSF BMDMs were pre-treated with KCl (50mM) before adding to plates coated with AF-2 (8 nmol/well concentration for SytoxGreen assay; 1 or 8 nmol/well for LDH assay), or stimulated with nigericin (10  $\mu$ M) or TritonX (1%). A) Fluorescence of Sytox Green (1  $\mu$ M) was measured over time; results are calculated relative to iPROH control fluorescence. LDH release was measured at 4 h and in B) WT and C) Mincle<sup>-/-</sup> mice from the supernatant. D) IL-1 $\beta$  was measured from the supernatant at 24 h by ELISA. Data represent the Mean  $\pm$  SEM of A) a representative experiment performed three times in triplicate, B-D) three experiments performed in triplicate. Statistical significance was calculated in comparison to control using Multiple t-test, \*\*\*\*  $P \leq 0.0001$ , \*\*\*  $P \leq 0.001$ , \*\*  $P \leq 0.01$ , \*  $P \leq 0.05$ .

\*\*\*\*\*
